# Supplementary material for: Radiomics features of the primary tumor fail to improve prediction of overall survival in large cohorts of CT- and PET-imaged head and neck cancer patients
Source: PLOS journal article supplement (doi:10.1371/journal.pone.0222509), 2019-09-19
Supplement: S1 (10.1371/journal.pone.0222509.s001) [file journal.pone.0222509.s001]

**S1 Table. Radiomics Features used in CT Analysis**

| Gray Level Co-occurrence Matrix   | Gray Level Run Length Matrix       | Intensity Histogram | Neighborhood Gray Tone Difference Matrix |
|-----------------------------------|------------------------------------|---------------------|------------------------------------------|
| Auto Correlation                  | Gray Level Nonuniformity           | Energy              | Busyness                                 |
| Cluster Prominence                | High Gray Level Run Emphasis       | Entropy             | Coarseness                               |
| Cluster Shade                     | Long Run Emphasis                  | Kurtosis            | Complexity                               |
| Cluster Tendency                  | Long Run High Gray Level Emphasis  | Mean                | Contrast                                 |
| Contrast                          | Long Run Low Gray Level Emphasis   | Median              | Texture Strength                         |
| Correlation                       | Low Gray Level Run Emphasis        | Minimum             |                                          |
| Difference Entropy                | Run Length Nonuniformity           | Skewness            |                                          |
| Dissimilarity                     | Run Percentage                     | Standard Deviation  |                                          |
| Energy                            | Short Run Emphasis                 | Uniformity          |                                          |
| Entropy                           | Short Run High Gray Level Emphasis | Variance            |                                          |
| Homogeneity                       | Short Run Low Gray Level Emphasis  |                     |                                          |
| Homogeneity 2                     |                                    |                     |                                          |
| Information Measure Correlation 1 |                                    |                     |                                          |
| Information Measure Correlation 2 |                                    |                     |                                          |
| Inverse Difference Moment Norm    |                                    |                     |                                          |
| Inverse Difference Norm           |                                    |                     |                                          |
| Inverse Variance                  |                                    |                     |                                          |
| Max Probability                   |                                    |                     |                                          |
| Sum Average                       |                                    |                     |                                          |
| Sum Entropy                       |                                    |                     |                                          |
| Sum Variance                      |                                    |                     |                                          |
| Variance                          |                                    |                     |                                          |
